# Supplementary material
Source: Springer Nature journal article supplement (https://www.springermedizin.de/resource/supplementary/13051_2009_40_MOESM4_ESM.pdf/9669818)

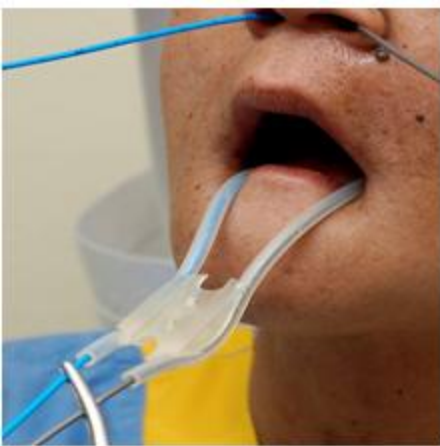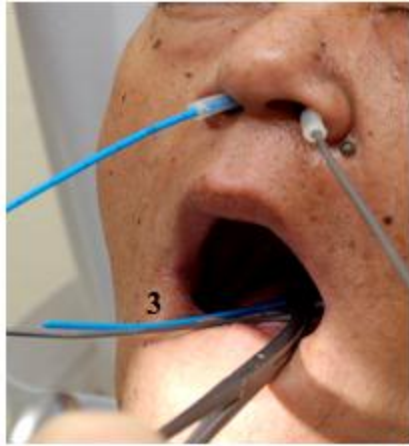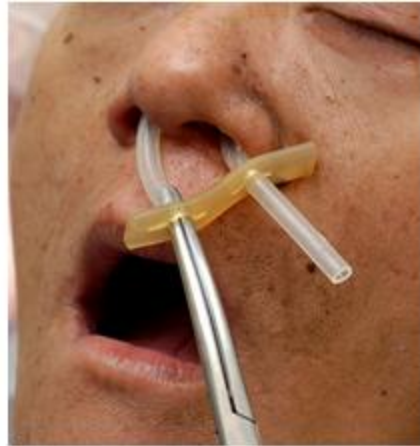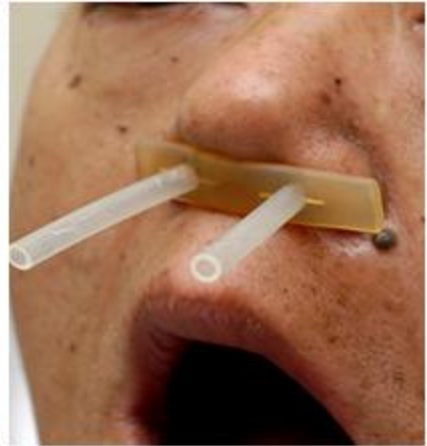

Supplement: MOESM4 [file 9669818]
